# Supplementary material for: Adaptation and Validation of a Nutrition Environment Measures Survey for University Grab-and-Go Establishments
Source: Atypon-hosted journal article supplement (doi:10.3148/cjdpr-2015-036), 2015-11-16
Supplement: cjdpr-2015-036suppl.pdf [file cjdpr-2015-036suppl.pdf]

**Supplementary Table 1: Scoring System used for Nutrition Environment Measures Survey-Grab-and-Go (NEMS-GG) Tool**

| Scoring Instructions                                                                                                                                                                                                                                            | Healthier option(s) criteria                                                | Maximum Score Possible:<br>Explanation                                                                             | Total<br>Maximum<br>Score |
|-----------------------------------------------------------------------------------------------------------------------------------------------------------------------------------------------------------------------------------------------------------------|-----------------------------------------------------------------------------|--------------------------------------------------------------------------------------------------------------------|---------------------------|
| <b><u>Menu labelling</u></b>                                                                                                                                                                                                                                    |                                                                             |                                                                                                                    |                           |
| Evidence of nutrition labelling at point-of-purchase for non-pre-packaged food items = 2 points                                                                                                                                                                 | -                                                                           | 2 points maximum for nutrition information available                                                               | <b>2</b>                  |
| <b><u>Whole Fruit</u></b>                                                                                                                                                                                                                                       |                                                                             |                                                                                                                    |                           |
| <b>Availability &amp; variety:</b><br>Total 1 fruit option available = 1 point<br>2-4 options available = 2 points<br>5+ options = 3 points<br><br><b>Pricing:</b> no additional points                                                                         | -                                                                           | 3 points maximum for availability and variety                                                                      | <b>3</b>                  |
| <b><u>Fresh Fruit Packages</u></b>                                                                                                                                                                                                                              |                                                                             |                                                                                                                    |                           |
| <b>Availability &amp; variety:</b><br>Fruit package available = 2 points<br>Total 2 + fruit package options available = 3 points<br>Healthier condiments = 1 point<br><br><b>Pricing:</b> no additional points                                                  | Healthier condiments = package indicates low-fat, vinaigrette, not in syrup | 3+1 = 4 points<br>3 points for availability and variety, 1 point for availability and variety of healthier options | <b>4</b>                  |
| <b><u>Fresh Vegetable Packages</u></b>                                                                                                                                                                                                                          |                                                                             |                                                                                                                    |                           |
| <b>Availability &amp; variety:</b><br>Vegetable package (salads containing protein NOT included) available = 2 points<br>Total 2 + vegetable package options available = 3 points<br>Healthier condiments = 1 point<br><br><b>Pricing:</b> no additional points | Healthier condiments = package indicates low-fat, vinaigrette               | 3+1 = 4 points<br>3 points for availability and variety, 1 point for availability and variety of healthier options | <b>4</b>                  |
| <b><u>Bagel</u></b>                                                                                                                                                                                                                                             |                                                                             |                                                                                                                    |                           |
| <b>Availability &amp; variety:</b><br>Healthier bagel option = 2 points<br>2 + healthier bagel options = 3 points<br><br><b>Pricing:</b><br>Lowest price healthier option is <i>cheaper or same price</i>                                                       | Healthier bagel option = whole grain or whole wheat                         | 3+1 = 4 points<br>3 points for availability and variety, 1 point for affordability of healthier option             | <b>4</b>                  |

|                                                                                                                                                                                                                                                                                       |                                                                                                                                         |                                                                                                        |          |
|---------------------------------------------------------------------------------------------------------------------------------------------------------------------------------------------------------------------------------------------------------------------------------------|-----------------------------------------------------------------------------------------------------------------------------------------|--------------------------------------------------------------------------------------------------------|----------|
| as regular option = 1 point                                                                                                                                                                                                                                                           |                                                                                                                                         |                                                                                                        |          |
| <b><u>Bread</u></b>                                                                                                                                                                                                                                                                   |                                                                                                                                         |                                                                                                        |          |
| <b>Availability &amp; variety:</b><br>Healthier bread option = 2 points<br>2 + healthier bread options = 3 points<br><br><b>Pricing:</b><br>Lowest price healthier option is <i>cheaper or same price</i><br>as regular option = 1 point                                              | Healthier bread option = whole grain or whole wheat                                                                                     | 3+1 = 4 points<br>3 points for availability and variety, 1 point for affordability of healthier option | <b>4</b> |
| <b><u>Muffin</u></b>                                                                                                                                                                                                                                                                  |                                                                                                                                         |                                                                                                        |          |
| <b>Availability &amp; variety:</b><br>Low-fat muffin option = 2 points<br>2 + low-fat muffin options = 3 points<br><br><b>Pricing:</b><br>Lowest price healthier option is <i>cheaper or same price</i><br>as regular option = 1 point                                                | Low-fat muffin = store/package indicates low-fat                                                                                        | 3+1 = 4 points<br>2 points for availability and variety, 1 point for affordability of healthier option | <b>4</b> |
| <b><u>Yogurt</u></b>                                                                                                                                                                                                                                                                  |                                                                                                                                         |                                                                                                        |          |
| <b>Availability &amp; variety:</b><br>Low-fat yogurt option = 2 points<br>2 + low-fat options = 3 points<br><br><b>Pricing:</b><br>Lowest price healthier option is <i>cheaper or same price</i><br>as regular option = 1 point                                                       | Low-fat yogurt = 2% fat or less                                                                                                         | 3+1 = 4 points<br>3 points for availability and variety 1 point for affordability of healthier option  | <b>4</b> |
| <b><u>Yogurt-based Parfait</u></b>                                                                                                                                                                                                                                                    |                                                                                                                                         |                                                                                                        |          |
| <b>Availability &amp; variety:</b><br>Yogurt-based parfait – sugar-free or fat-free parfait option = 2 points<br>2 + sugar-free or fat-free options = 3 points<br><br><b>Pricing:</b><br>Lowest price healthier option is <i>cheaper or same price</i><br>as regular option = 1 point | Low-fat yogurt-based parfait = store/package indicates 2% fat or less<br><br>Sugar-free parfait = no added sugar indicated on packaging | 3+1 = 4 points<br>3 points for availability and variety, 1 point for affordability of healthier option | <b>4</b> |
| <b><u>Chips</u></b>                                                                                                                                                                                                                                                                   |                                                                                                                                         |                                                                                                        |          |
| <b>Availability &amp; variety:</b><br>Baked option available = 2 points                                                                                                                                                                                                               | Baked chips = package indicates baked                                                                                                   | 2+1 = 3 points<br>2 points for availability of healthier                                               | <b>3</b> |

|                                                                                                                                                                                                                                                                 |                                                                                                                                                                                                                                                                                                                                                                                                                                                                                                                                                                                      |                                                                                                        |          |
|-----------------------------------------------------------------------------------------------------------------------------------------------------------------------------------------------------------------------------------------------------------------|--------------------------------------------------------------------------------------------------------------------------------------------------------------------------------------------------------------------------------------------------------------------------------------------------------------------------------------------------------------------------------------------------------------------------------------------------------------------------------------------------------------------------------------------------------------------------------------|--------------------------------------------------------------------------------------------------------|----------|
| <b>Pricing:</b><br>Lowest price healthier option is <i>cheaper or same price</i><br>as regular option = 1 point                                                                                                                                                 |                                                                                                                                                                                                                                                                                                                                                                                                                                                                                                                                                                                      | option, 1 point for affordability of healthier option                                                  |          |
| <b>Wrap</b>                                                                                                                                                                                                                                                     |                                                                                                                                                                                                                                                                                                                                                                                                                                                                                                                                                                                      |                                                                                                        |          |
| <b>Availability &amp; variety:</b><br>1 healthier option = 1 point<br>2-3 healthier choice = 2 points<br>4+ healthy choices = 3 points<br><br><b>Pricing:</b><br>Lowest price healthier option is <i>cheaper or same price</i><br>as regular option = 1 point   | Healthier option = NOT cream-based sauce/dressing (mayonnaise OK), whole grain, healthier protein and preparation; NOT deep fried. Each entrée is counted only once.<br><br><i>Example: Fried chicken on whole grain is NOT healthier option; grilled vegetables on whole grain is counted as ONE option.</i><br><br>Healthier protein in wraps = lean poultry, fish, or vegetable-based protein<br>Healthier preparation in wraps = cooking methods that do not use relatively large amounts of fat, e.g. boiling, broiling, grilling, steaming, roasting, braising, poaching, raw) | 3+1 = 4 points<br>3 points for availability and variety, 1 point for affordability of healthier option | <b>4</b> |
| <b>Sandwich</b>                                                                                                                                                                                                                                                 |                                                                                                                                                                                                                                                                                                                                                                                                                                                                                                                                                                                      |                                                                                                        |          |
| <b>Availability &amp; variety:</b><br>1 healthier option = 1 point<br>2-3 healthier options = 2 points<br>4+ healthier option = 3 points<br><br><b>Pricing:</b><br>Lowest price healthier option is <i>cheaper or same price</i><br>as regular option = 1 point | Same as wraps                                                                                                                                                                                                                                                                                                                                                                                                                                                                                                                                                                        | 3+1 = 4 points<br>3 points for availability and variety, 1 point for affordability of healthier option | <b>4</b> |
| <b>Salad Bar</b>                                                                                                                                                                                                                                                |                                                                                                                                                                                                                                                                                                                                                                                                                                                                                                                                                                                      |                                                                                                        |          |
| <b>Availability &amp; variety:</b><br>Salad bar available: 2 points                                                                                                                                                                                             | -                                                                                                                                                                                                                                                                                                                                                                                                                                                                                                                                                                                    | 2 points maximum for salad bar available                                                               | <b>2</b> |
| <b>Entrée Salad</b>                                                                                                                                                                                                                                             |                                                                                                                                                                                                                                                                                                                                                                                                                                                                                                                                                                                      |                                                                                                        |          |
| <b>Availability &amp; variety:</b><br>1 healthier option = 1 point<br>2-3 healthier options = 2 points<br>4+ healthier option = 3 points                                                                                                                        | Healthier option = Healthier protein (lean poultry, fish, or vegetable-based protein); vinaigrette or low-fat dressing                                                                                                                                                                                                                                                                                                                                                                                                                                                               | 3+1 = 4 points<br>3 points for availability and variety, 1 point for affordability of healthier option | <b>4</b> |

|                                                                                                                                                                                                                                                                 |                                             |                                                                                                        |          |
|-----------------------------------------------------------------------------------------------------------------------------------------------------------------------------------------------------------------------------------------------------------------|---------------------------------------------|--------------------------------------------------------------------------------------------------------|----------|
| <b>Pricing:</b><br>Lowest price healthier option is <i>cheaper or same price</i><br>as regular option = 1 point                                                                                                                                                 |                                             |                                                                                                        |          |
| <b><u>Pasta Salad</u></b>                                                                                                                                                                                                                                       |                                             |                                                                                                        |          |
| <b>Availability &amp; variety:</b><br>1 healthier option = 1 point<br>2-3 healthier options = 2 points<br>4+ healthier option = 3 points<br><br><b>Pricing:</b><br>Lowest price healthier option is <i>cheaper or same price</i><br>as regular option = 1 point | Same as entrée salad                        | 3+1 = 4 points<br>3 points for availability and variety, 1 point for affordability of healthier option | <b>4</b> |
| <b><u>Soup</u></b>                                                                                                                                                                                                                                              |                                             |                                                                                                        |          |
| <b>Availability &amp; variety:</b><br>1 healthier option = 1 point<br>2-3 healthier options = 2 points<br>4+ healthier option = 3 points<br><br><b>Pricing:</b><br>Lowest price healthier option is <i>cheaper or same price</i><br>as regular option = 1 point | Vegetarian/vegan or low sodium              | 3+1 = 4 points<br>3 points for availability and variety, 1 point for affordability of healthier option | <b>4</b> |
| <b><u>Sushi</u></b>                                                                                                                                                                                                                                             |                                             |                                                                                                        |          |
| <b>Availability &amp; variety:</b><br>1 healthier option = 1 point<br>2-3 healthier options = 2 points<br>4+ healthier option = 3 points<br><br><b>Pricing:</b><br>Lowest price healthier option is <i>cheaper or same price</i><br>as regular option = 1 point | Vegetarian/vegan or brown rice              | 3+1 = 4 points<br>3 points for availability and variety, 1 point for affordability of healthier option | <b>4</b> |
| <b><u>Pizza</u></b>                                                                                                                                                                                                                                             |                                             |                                                                                                        |          |
| <b>Availability &amp; variety:</b><br>1 healthier option = 1 point<br>2-3 healthier options = 2 points<br>4+ healthier option = 3 points<br><br><b>Pricing:</b><br>Lowest price healthier option is <i>cheaper or same price</i>                                | Vegetarian/vegan or whole wheat/whole grain | 3+1 = 4 points<br>3 points for low-fat, 1 point for affordability of healthier option                  | <b>4</b> |

|                                                                                                                                                                                               |                                                                                                                         |                                                                                                                                                      |                  |
|-----------------------------------------------------------------------------------------------------------------------------------------------------------------------------------------------|-------------------------------------------------------------------------------------------------------------------------|------------------------------------------------------------------------------------------------------------------------------------------------------|------------------|
| as regular option = 1 point                                                                                                                                                                   |                                                                                                                         |                                                                                                                                                      |                  |
| <b><u>Milk</u></b>                                                                                                                                                                            |                                                                                                                         |                                                                                                                                                      |                  |
| <b>Availability &amp; variety:</b><br>Low-fat milk available = 3 points<br><br><b>Pricing:</b><br>Lowest for lowest fat milk is <i>cheaper or same price</i> as regular option = 1 point      | 2% or lower fat                                                                                                         | 3+1 = 4 points<br>3 points for low-fat, 1 point for affordability of healthier option                                                                | <b>4</b>         |
| <b><u>Juice</u></b>                                                                                                                                                                           |                                                                                                                         |                                                                                                                                                      |                  |
| <b>Availability &amp; variety:</b><br>Real fruit juice available = 1 points<br>2+ real fruit juice options available = 2 points                                                               | 100% fruit juice                                                                                                        | 2 points<br>2 points for availability and variety                                                                                                    | <b>2</b>         |
| <b><u>Caffeinated Beverages</u></b>                                                                                                                                                           |                                                                                                                         |                                                                                                                                                      |                  |
| <b>Availability &amp; variety:</b><br>Decaf coffee and/or tea available = 1 point<br>Low-fat milk available at milk bar = 1 point<br><br>Artificial sweetener available at milk bar = 1 point | Decaffeinated tea or coffee<br><br>Healthier condiments = 1% or skim milk available at milk bar, calorie-free sweetener | Caffeinated beverages: 1+1+1 = 3 points<br>1 point for decaf options, 1 point for low-fat milk at milk bar, 1 point for artificial sweetener offered | <b>3</b>         |
|                                                                                                                                                                                               |                                                                                                                         | 75 points                                                                                                                                            | <b>75 points</b> |
